# Supplementary material for: Mild hydrothermally treated brewer's spent grain for efficient removal of uranyl and rare earth metal ions
Source: Royal Society of Chemistry journal article supplement (doi:10.1039/d0ra08164g), 2020-01-01
Supplement: d0ra08164g1.pdf [file d0ra08164g1.pdf]

## Supplementary information

### Mild hydrothermal treated brewer's spent grain for efficient removal of uranyl and rare earth metal ions

Yi Su<sup>a</sup>, Wendelin Böhm<sup>b</sup>, Marco Wenzel<sup>a</sup>, Silvia Paasch<sup>c</sup>, Margret Acker<sup>d</sup>, Thomas Doert,<sup>e</sup> Eike Brunner<sup>c</sup>, Thomas Henle<sup>b</sup>, Jan J. Weigand<sup>a\*</sup>

<sup>a</sup> Chair of Inorganic Molecular Chemistry, TU Dresden, 01062 Dresden, Germany

<sup>b</sup> Chair of Food Chemistry, TU Dresden, 01062 Dresden, Germany

<sup>c</sup> Chair of Bioanalytical Chemistry, TU Dresden, 01062 Dresden, Germany

<sup>d</sup> Central Radionuclide Laboratory, TU Dresden, 01062 Dresden, Germany

<sup>e</sup> Chair of Inorganic Chemistry II, TU Dresden, 01062 Dresden, Germany.

#### Table list

**Table S1** Parameters of the mashing process to produce BSG.

**Table S2** Elemental analysis of BSG-based adsorbents.

**Table S3** Mineral elements contents of BSG-based adsorbents.

**Table S4** STA-GC-MS results of BSG (375–385 °C), ABSG (375–385 °C) and Yb-ABSG (375–385 °C). For STA, 20 °C/min, helium atmosphere. For GC, 35 °C for 3 min, increased with 5 °C/min until 220 °C, and hold at 220 °C for 3 min.

#### Figure list

**Fig. S1** Raw FT-IR spectra of BSG-based adsorbents with varied (a) reaction temperature, (b) reaction time and with (c) metal adsorption. For ion-loading: 50 mg ABSG-150 °C, 16 h/ 50 mL solution, pH(La<sup>3+</sup>, Eu<sup>3+</sup>, Yb<sup>3+</sup>) = 5.7, pH(UO<sub>2</sub><sup>2+</sup>) = 4.7, c<sub>0</sub>(La<sup>3+</sup>, Eu<sup>3+</sup>, Yb<sup>3+</sup>) = 100 mg/L, c<sub>0</sub>(UO<sub>2</sub><sup>2+</sup>) = 300 mg/L, t = 1 h, room temperature.

**Fig. S2** Raw FT-IR spectra of BSG and ABSG-150 °C, 16 h with bands position.

**Fig. S3** Chemical structure of investigated MRPs.

**Fig. S4** Pictures of BSG (left) and ABSG-150 °C, 16 h (right).

**Fig. S5** Adsorption capacity of La<sup>3+</sup>, Eu<sup>3+</sup>, Yb<sup>3+</sup> and UO<sub>2</sub><sup>2+</sup> onto ABSG obtained employing air (ABSG-Air) and argon (ABSG-Ar) atmosphere. For hydrothermal treatment: 150 °C, 16 h. For adsorption: 2 mg adsorbent/ 2 mL solution, c<sub>0</sub>(La<sup>3+</sup>, Eu<sup>3+</sup>, Yb<sup>3+</sup>) = 100 mg/L, c<sub>0</sub>(UO<sub>2</sub><sup>2+</sup>) = 300 mg/L, pH(La<sup>3+</sup>, Eu<sup>3+</sup>, Yb<sup>3+</sup>) = 5.7, pH(UO<sub>2</sub><sup>2+</sup>) = 4.7, 1 h, room temperature.

**Fig. S6** Comparison of Yb<sup>3+</sup> adsorption capacity onto BSG and ABSG determined by ICP method and radiotracer method (1 mg adsorbent/ 1 mL solution, c<sub>0</sub>(Yb<sup>3+</sup>) = 100 mg/L, pH = 5.5, 2 h, room temperature).

**Fig. S7** Effect of the starting pH on the difference pH of BSG and ABSG to determine the point of zero charge (pH<sub>PZC</sub>).

**Fig. S8** Comparison of different adsorbents in present study and literature.<sup>1-17</sup>

---

\*Corresponding author

E-mail address: jan.weigand@tu-dresden.de (J.J. Weigand)

**Fig. S9** Adsorption isotherms of (a)  $\text{La}^{3+}$  onto BSG, (b)  $\text{La}^{3+}$  onto ABSG, (c)  $\text{Eu}^{3+}$  onto BSG, (d)  $\text{Eu}^{3+}$  onto ABSG, (e)  $\text{Yb}^{3+}$  onto BSG, (f)  $\text{Yb}^{3+}$  onto ABSG, (g)  $\text{UO}_2^{2+}$  onto BSG and (h)  $\text{UO}_2^{2+}$  onto ABSG. For adsorption, 2 mg adsorbent/ 2 mL metal solution,  $c_0 = 100\text{--}600$  mg/L,  $t_{\text{BSG}} = 2$  h,  $t_{\text{ABSG}} = 1$  h,  $\text{pH}(\text{UO}_2^{2+}) = 4.7$ ,  $\text{pH}(\text{La}^{3+}, \text{Eu}^{3+}, \text{Yb}^{3+}) = 5.7$ ,  $T = 25$  °C, 45 °C, 65 °C, stirrer speed = 180 rpm.

**Fig. S10** Langmuir model fitting of isotherms of (a)  $\text{La}^{3+}$  onto BSG, (b)  $\text{La}^{3+}$  onto ABSG, (c)  $\text{Eu}^{3+}$  onto BSG, (d)  $\text{Eu}^{3+}$  onto ABSG, (e)  $\text{Yb}^{3+}$  onto BSG, (f)  $\text{Yb}^{3+}$  onto ABSG, (g)  $\text{UO}_2^{2+}$  onto BSG and (h)  $\text{UO}_2^{2+}$  onto ABSG.

**Fig. S11**  $\ln K_e^0$  versus  $1/T$  plot for thermodynamic parameters calculation (a) BSG and (b) ABSG.

**Fig. S12** (a-c) SEM image (1000x), EDX element mapping (20 kV/10  $\mu\text{A}$ , 5000x, 25 frames) and distribution of La on La loaded-ABSG, (d-f) SEM image (1000x), EDX mapping (20 kV/10  $\mu\text{A}$ , 1000x, 25 frames) and distribution of Eu on Eu loaded-ABSG and (g-i) SEM image (1000x), EDX mapping (20 kV/10  $\mu\text{A}$ , 5000x, 25 frames) and distribution of Yb on Yb loaded-ABSG. For ion-loading: 50 mg ABSG/ 50 mL solution,  $\text{pH} = 5.7$ ,  $c_0 = 100$  mg/L,  $t = 1$  h, room temperature.

**Table S1** Parameters of the mashing process to produce BSG.

| Procedure    | Initial temperature (°C) | End temperature (°C) | Time (min) |
|--------------|--------------------------|----------------------|------------|
| Mash-in      | 55                       | 54.8                 | 10         |
| Protein rest | 62                       | 61.8                 | 30         |
| Maltose rest | 68                       | 67.8                 | 10         |
| Sugar rest   | 72                       | 71.8                 | 25         |
| Mash-out     | 78                       | 77.8                 | 10         |

**Table S2** Elemental analysis of BSG-based adsorbents.

| Sample            | N (%) | C(%) | H(%) | S(%) | Mineral(%) | O(%) |
|-------------------|-------|------|------|------|------------|------|
| BSG               | 5.1   | 49.1 | 6.1  | 0.3  | 1.3        | 38.1 |
| ABSG-1 h, 150 °C  | 4.9   | 47.4 | 6.5  | 0.4  | 1.3        | 39.4 |
| ABSG-4 h, 150 °C  | 4.5   | 48.5 | 7.6  | 0.2  | 1.3        | 38.0 |
| ABSG-8 h, 150 °C  | 4.2   | 49.4 | 7.8  | 0.0  | 1.3        | 37.3 |
| ABSG-16 h, 150 °C | 5.0   | 53.4 | 6.8  | 0.3  | 1.6        | 32.8 |
| ABSG-24 h, 150 °C | 4.6   | 60.8 | 6.8  | 0.4  | 0.4        | 27.0 |
| ABSG-16 h, 100 °C | 4.4   | 48.2 | 7.3  | 0.2  | 1.2        | 38.7 |
| ABSG-16 h, 125 °C | 4.2   | 48.2 | 7.1  | 0.3  | 1.3        | 38.9 |
| ABSG-16 h, 175 °C | 4.1   | 63.0 | 6.2  | 0.3  | 0.3        | 26.0 |

**Table S3** Mineral elements contents of BSG-based adsorbents.

| Sample               | Ca<br>(mg/kg) | Mg<br>(mg/kg) | P<br>(mg/kg) | Si<br>(mg/kg) | Fe<br>(mg/kg) | K<br>(mg/kg) | Mn<br>(mg/kg) | Na<br>(mg/kg) | Zn<br>(mg/kg) |
|----------------------|---------------|---------------|--------------|---------------|---------------|--------------|---------------|---------------|---------------|
| BSG                  | 2669 ± 7      | 2509 ± 27     | 5861 ± 103   | 791 ± 7       | 240 ± 4       | 849 ± 9      | 41 ± 1        | 166 ± 11      | 139 ± 4       |
| ABSG 150<br>°C, 1 h  | 2321 ± 43     | 2627 ± 48     | 5895 ± 56    | 625 ± 15      | 155 ± 1       | 816 ± 9      | 36 ± 0.1      | 92 ± 5        | 98 ± 4        |
| ABSG 150<br>°C, 4 h  | 2481 ± 10     | 2714 ± 7      | 6066 ± 20    | 1033 ± 9      | 177 ± 3       | 729 ± 3      | 39 ± 1        | 58 ± 6        | 96 ± 2        |
| ABSG 150<br>°C, 8 h  | 3065 ± 86     | 2343 ± 54     | 5127 ± 134   | 974 ± 36      | 195 ± 7       | 664 ± 18     | 39 ± 0.4      | 67 ± 5        | 122 ± 1       |
| ABSG<br>150°C, 16 h  | 2717 ± 4      | 3201 ± 30     | 7737 ± 2     | 1077 ± 12     | 293 ± 0.1     | 1083 ± 12    | 52 ± 0.1      | 137 ± 2       | 154 ± 1       |
| ABSG 150<br>°C, 24 h | 2549 ± 62     | 191 ± 15      | 532 ± 44     | 281 ± 48      | 219 ± 12      | 120 ± 5      | 165 ± 3       | 62 ± 4        | 94 ± 1        |
| ABSG 100<br>°C, 16 h | 2174 ± 37     | 2205 ± 5      | 5283 ± 25    | 894 ± 14      | 163 ± 3       | 683 ± 8      | 35 ± 0.1      | 65 ± 2        | 105 ± 1       |
| ABSG 125<br>°C, 16 h | 2545 ± 42     | 2630 ± 51     | 5838 ± 107   | 1081 ± 12     | 159 ± 4       | 773 ± 14     | 41 ± 1        | 68 ± 5        | 124 ± 1       |
| ABSG 175<br>°C, 16 h | 1228 ± 35     | 333 ± 10      | 787 ± 68     | 288 ± 17      | 322 ± 7       | 53 ± 2       | 21 ± 0.2      | 170 ± 6       | 166 ± 2       |

Errors are those obtained from the ICP measurements.

**Table S4** STA-GC-MS results of BSG (375–385 °C), ABSG (375–385 °C) and Yb-ABSG (340–360 °C). For STA, 20 °C/min, helium atmosphere. For GC, 35 °C for 3 min, increased with 5 °C/min until 220 °C, and hold at 220 °C for 3 min.

| Name                  | Retention time (GC, min) | Formula                                      | BSG, Area % | ABSG, Area % | Yb-ABSG, Area % |
|-----------------------|--------------------------|----------------------------------------------|-------------|--------------|-----------------|
| Carbondioxide         | 9.51                     | CO <sub>2</sub>                              | 67.7        | 48.6         | 41.2            |
| Water                 | 9.78                     | H <sub>2</sub> O                             | 25.4        | 43.8         | 39.7            |
| Acetaldehyde          | 10.14                    | C <sub>2</sub> H <sub>4</sub> O              | 0.2         | 0.2          | 0.3             |
| Acetic anhydride      | 11.25                    | C <sub>4</sub> H <sub>6</sub> O <sub>5</sub> | 0.7         | 0.5          | 2.7             |
| Hydroxyacetaldehyde   | 12.43                    | C <sub>2</sub> H <sub>4</sub> O <sub>2</sub> | 0.3         | 0.1          | 4.9             |
| Acetic acid           | 13.04                    | C <sub>2</sub> H <sub>4</sub> O <sub>2</sub> | 0           | 1.3          | 2.7             |
| 2-Butanone            | 13.49                    | C <sub>4</sub> H <sub>8</sub> O              | 0.4         | 0.3          | 0.8             |
| 3-Methylfuran         | 13.93                    | C <sub>5</sub> H <sub>6</sub> O              | 1.5         | 1.8          | 1.3             |
| 2-methylfuran         | 14.01                    | C <sub>5</sub> H <sub>6</sub> O              | 0.3         | 0.4          | 0.3             |
| 1-Hydroxypropan-2-one | 15.14                    | C <sub>3</sub> H <sub>6</sub> O <sub>2</sub> | 1.2         | 0.2          | 1.9             |
| 3-Penten-2-one        | 15.92                    | C <sub>5</sub> H <sub>8</sub> O              | 0.5         | 0.6          | 0.6             |
| 2,5-Dimethylfuran     | 17.38                    | C <sub>6</sub> H <sub>8</sub> O              | 0.9         | 1.0          | 0.9             |
| Pyridin               | 18.62                    | C <sub>5</sub> H <sub>5</sub> N              | 0           | 0.6          | 1.1             |
| Furfural              | 21.79                    | C <sub>5</sub> H <sub>4</sub> O <sub>2</sub> | 0.2         | 0.2          | 0.6             |
| 1,2-Cyclopentanedione | 25.48                    | C <sub>5</sub> H <sub>6</sub> O <sub>2</sub> | 0.7         | 0.5          | 0.9             |

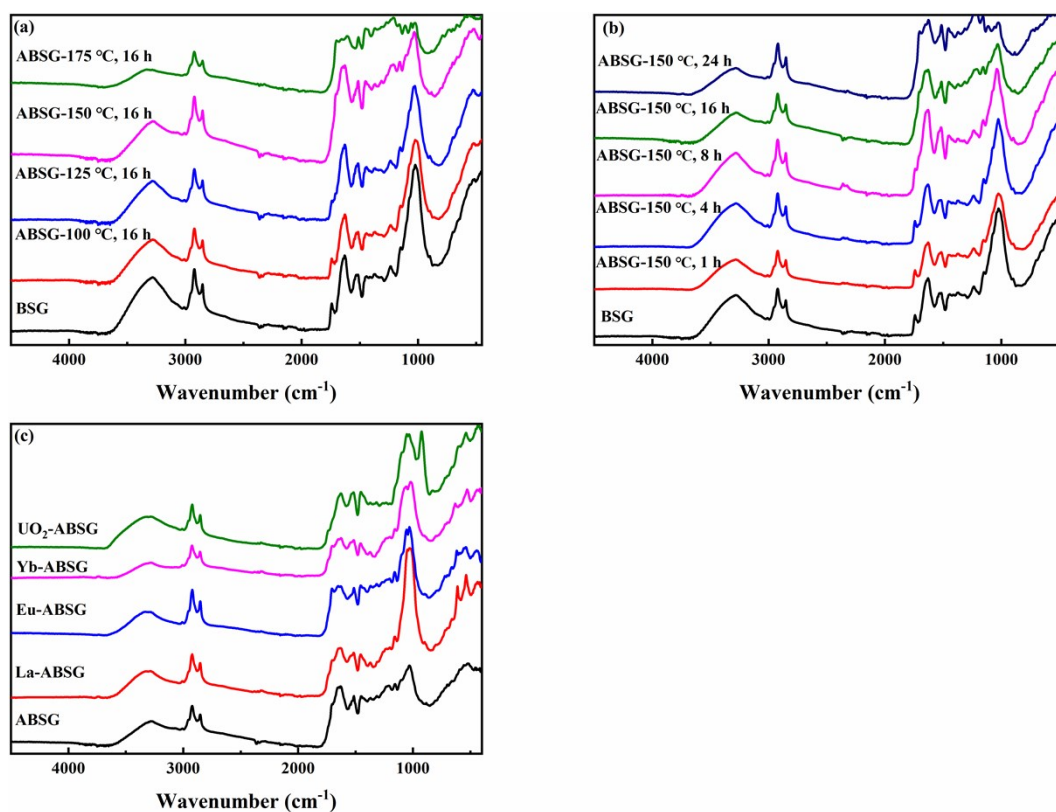

**Fig. S1** Raw FT-IR spectra of BSG-based adsorbents with varied (a) reaction temperature, (b) reaction time and with (c) metal adsorption. For ion-loading: 50 mg ABSG-150 °C, 16 h/ 50 mL solution,  $\text{pH}(\text{La}^{3+}, \text{Eu}^{3+}, \text{Yb}^{3+}) = 5.7$ ,  $\text{pH}(\text{UO}_2^{2+}) = 4.7$ ,  $c_0(\text{La}^{3+}, \text{Eu}^{3+}, \text{Yb}^{3+}) = 100 \text{ mg/L}$ ,  $c_0(\text{UO}_2^{2+}) = 300 \text{ mg/L}$ ,  $t = 1 \text{ h}$ , room temperature.

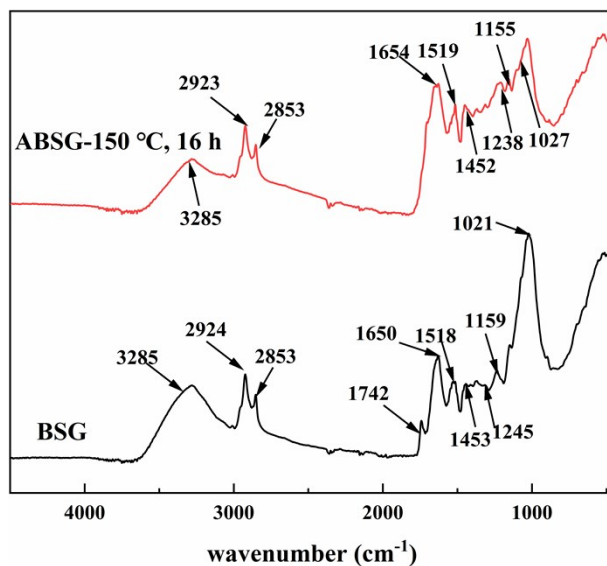

**Fig. S2** Raw FT-IR spectra of BSG and ABSG-150 °C, 16 h with bands position.

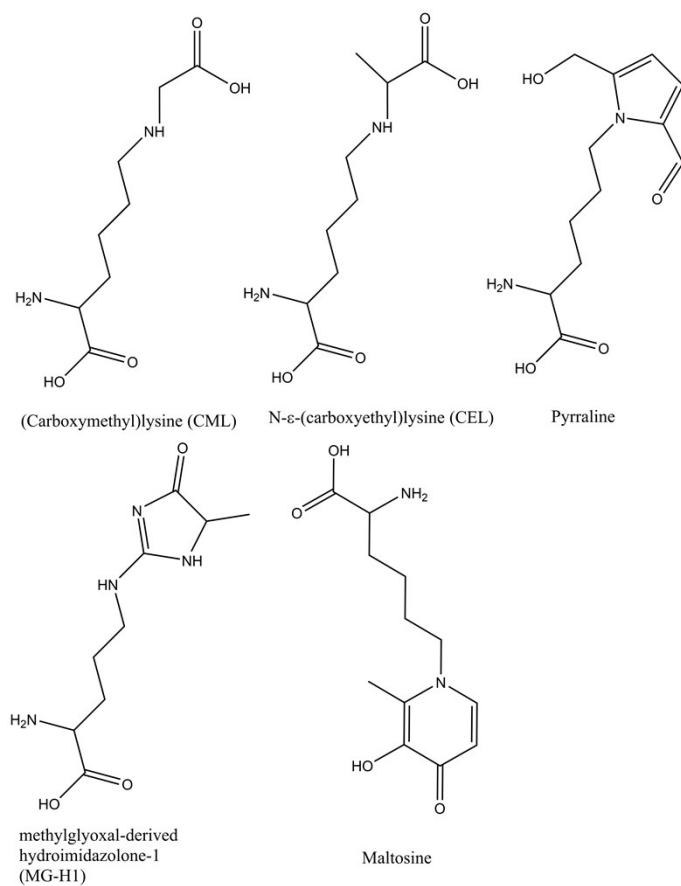

**Fig. S3** Chemical structure of investigated MRPs.

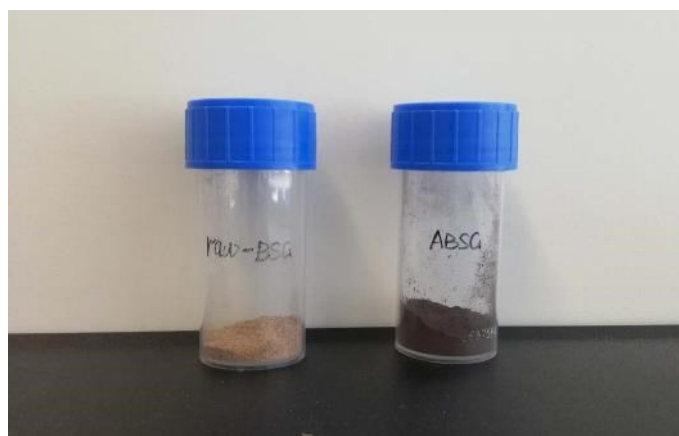

**Fig. S4** Pictures of BSG (left) and ABSG-150 °C, 16 h (right).

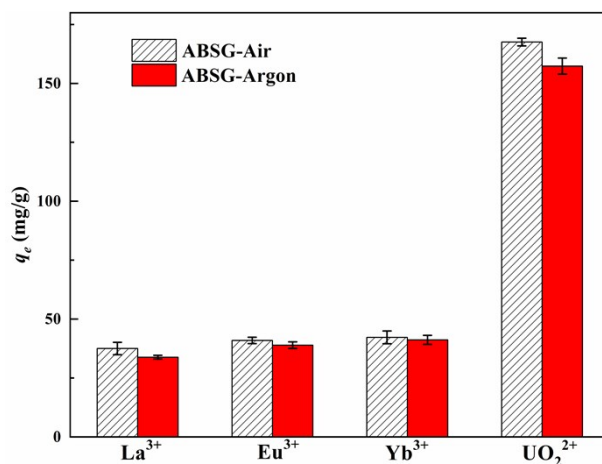

**Fig. S5** Adsorption capacity of La<sup>3+</sup>, Eu<sup>3+</sup>, Yb<sup>3+</sup> and UO<sub>2</sub><sup>2+</sup> onto ABSG obtained employing air (ABSG-Air) and argon (ABSG-Ar) atmosphere. For hydrothermal treatment: 150 °C, 16 h. For adsorption: 2 mg adsorbent/ 2 mL solution, c<sub>0</sub>(La<sup>3+</sup>, Eu<sup>3+</sup>, Yb<sup>3+</sup>) = 100 mg/L, c<sub>0</sub>(UO<sub>2</sub><sup>2+</sup>) = 300 mg/L, pH(La<sup>3+</sup>, Eu<sup>3+</sup>, Yb<sup>3+</sup>) = 5.7, pH(UO<sub>2</sub><sup>2+</sup>) = 4.7, 1 h, room temperature.

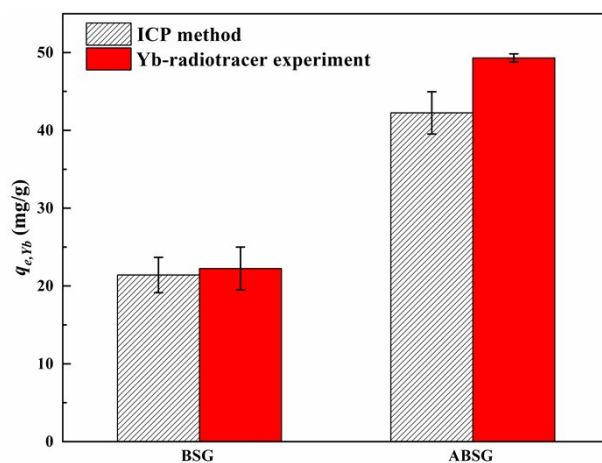

**Fig. S6** Comparison of Yb<sup>3+</sup> adsorption capacity onto BSG and ABSG determined by ICP method and radiotracer method (1mg adsorbent/ 1 mL solution, c<sub>0</sub>(Yb<sup>3+</sup>) = 100 mg/L, pH= 5.5, 2 h, room temperature).

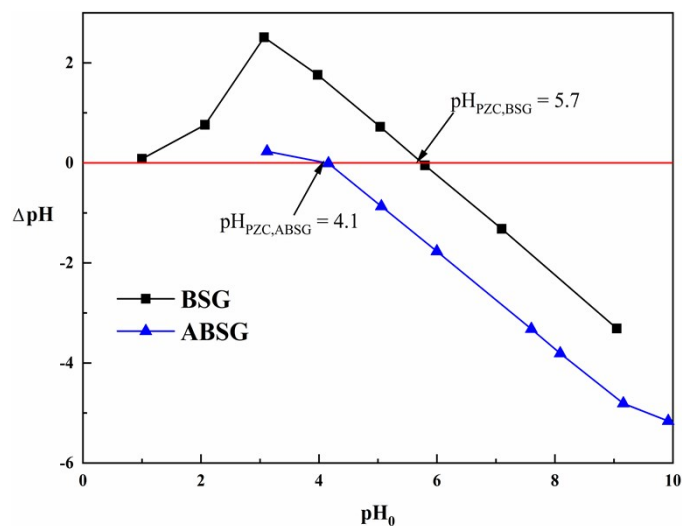

**Fig. S7** Effect of the starting pH on the difference pH of BSG and ABSG to determine the point of zero charge ( $pH_{PZC}$ ).

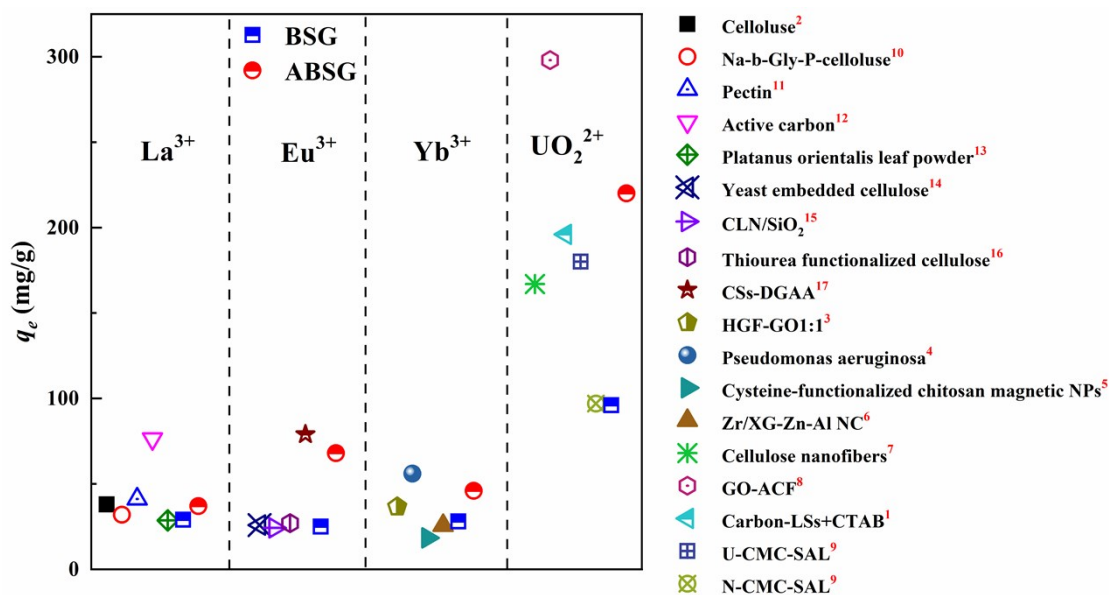

**Fig. S8** Comparison of different adsorbents in present study and literature.<sup>1-17</sup>



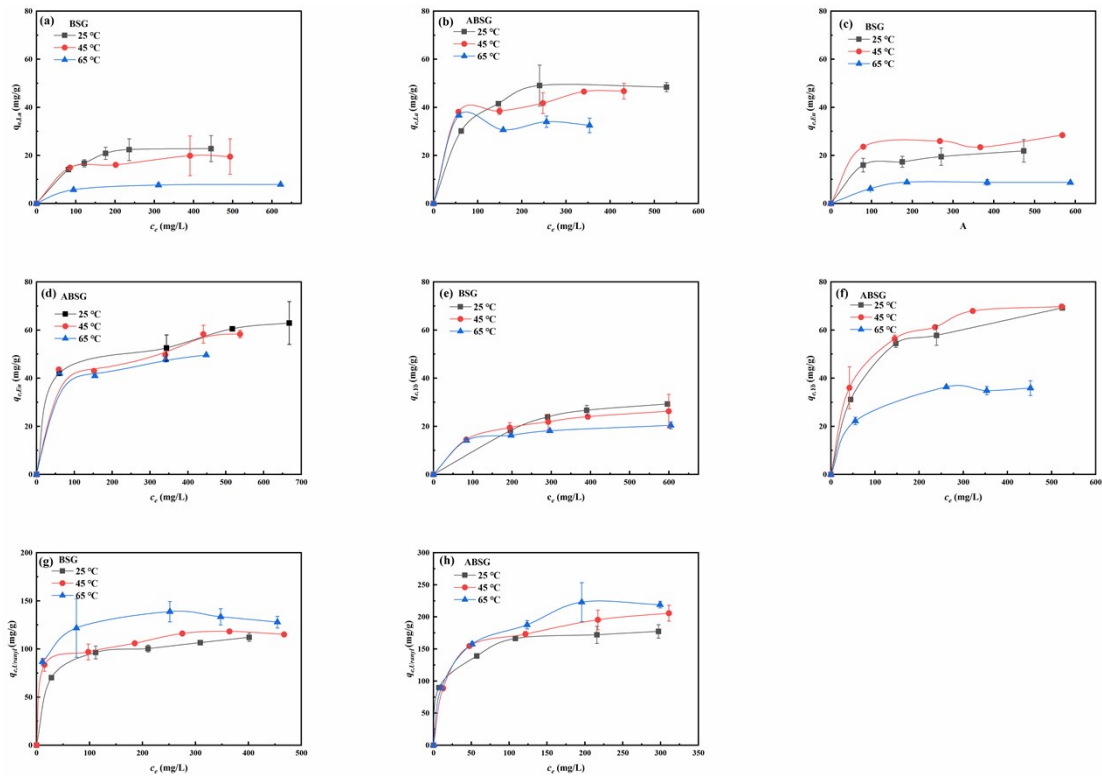

**Fig. S9** Adsorption isotherms of (a)  $\text{La}^{3+}$  onto BSG, (b)  $\text{La}^{3+}$  onto ABSG, (c)  $\text{Eu}^{3+}$  onto BSG, (d)  $\text{Eu}^{3+}$  onto ABSG, (e)  $\text{Yb}^{3+}$  onto BSG, (f)  $\text{Yb}^{3+}$  onto ABSG, (g)  $\text{UO}_2^{2+}$  onto BSG and (h)  $\text{UO}_2^{2+}$  onto ABSG. For adsorption, 2 mg adsorbent/ 2 mL metal solution,  $c_0 = 100\text{--}600$  mg/L,  $t_{\text{BSG}} = 2$  h,  $t_{\text{ABSG}} = 1$  h,  $\text{pH}(\text{UO}_2^{2+}) = 4.7$ ,  $\text{pH}(\text{La}^{3+}, \text{Eu}^{3+}, \text{Yb}^{3+}) = 5.7$ ,  $T = 25$  °C, 45 °C, 65 °C, stirrer speed = 180 rpm.

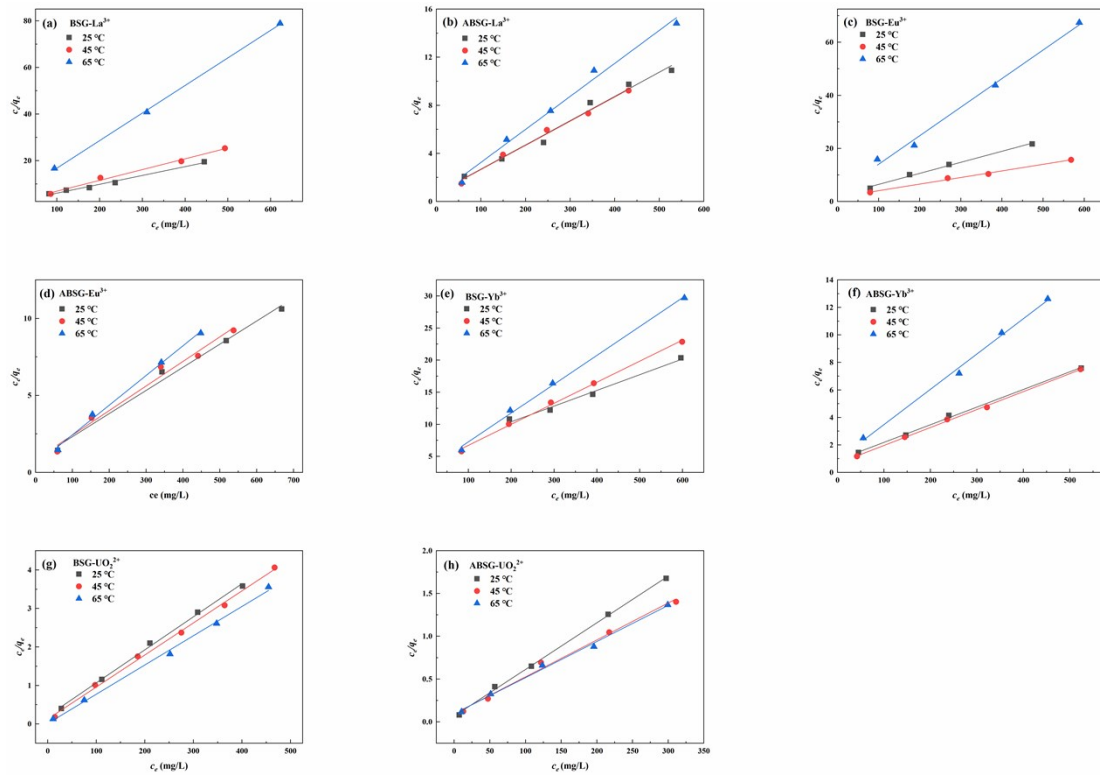

**Fig. S10** Langmuir model fitting of isotherms of (a) La<sup>3+</sup> onto BSG, (b) La<sup>3+</sup> onto ABSG, (c) Eu<sup>3+</sup> onto BSG, (d) Eu<sup>3+</sup> onto ABSG, (e) Yb<sup>3+</sup> onto BSG, (f) Yb<sup>3+</sup> onto ABSG, (g) UO<sub>2</sub><sup>2+</sup> onto BSG and (h) UO<sub>2</sub><sup>2+</sup> onto ABSG.

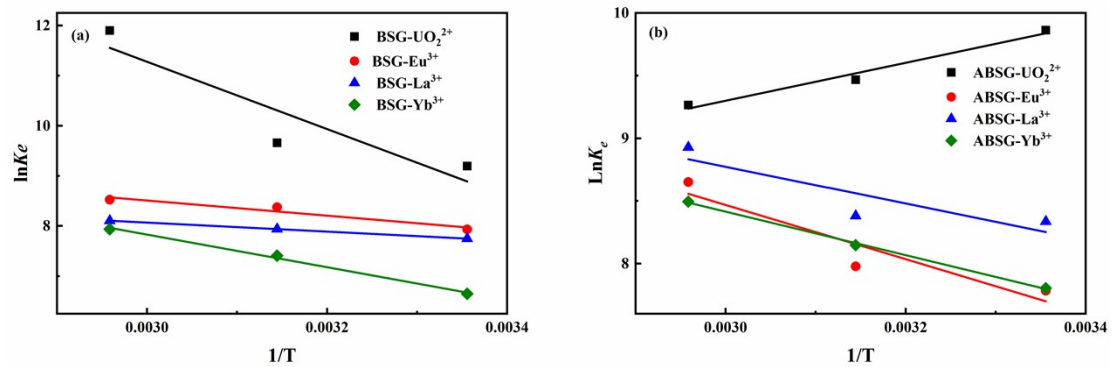

**Fig. S11**  $\ln K_e^0$  versus  $1/T$  plot for thermodynamic parameter calculations for (a) BSG and (b) ABSG.

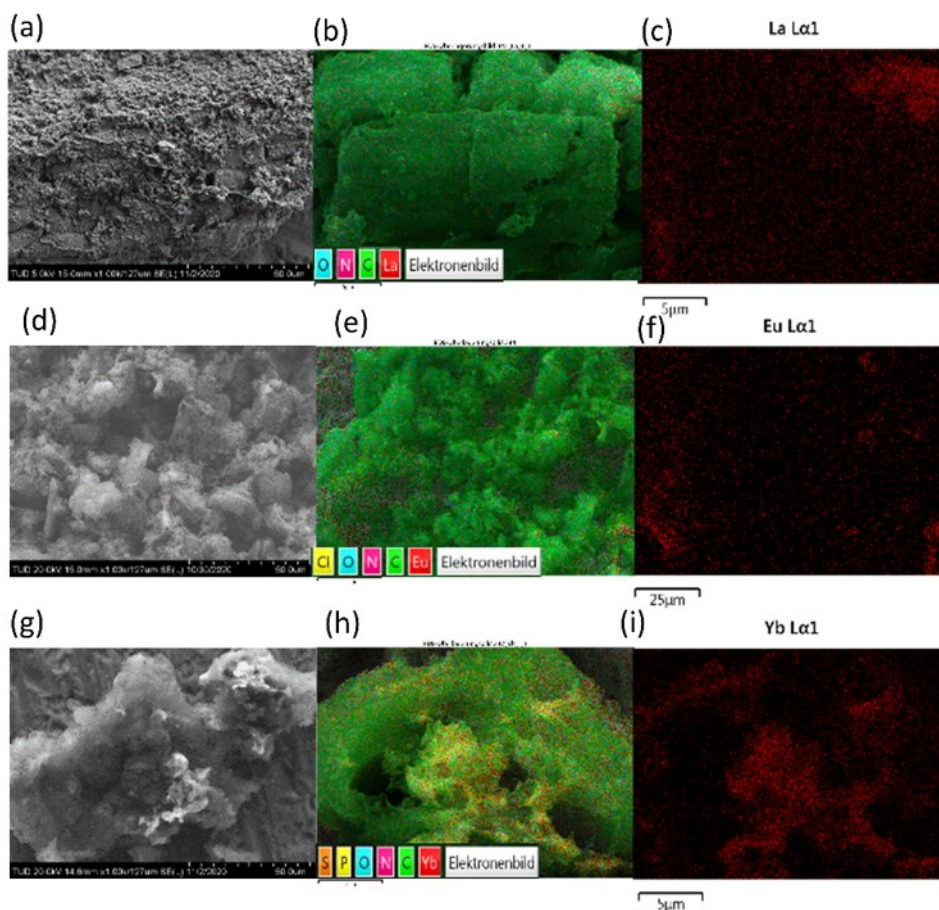

**Fig. S12** (a-c) SEM image (1000x), EDX element mapping (20 kV/10  $\mu$ A, 5000x, 25 frames) and distribution of La on La loaded-ABSG, (d-f) SEM image (1000x), EDX mapping (20 kV/10  $\mu$ A, 1000x, 25 frames) and distribution of Eu on Eu loaded-ABSG and (g-i) SEM image (1000x), EDX mapping (20 kV/10  $\mu$ A, 5000x, 25 frames) and distribution of Yb on Yb loaded-ABSG. For ion-loading: 50 mg ABSG/ 50 mL solution, pH= 5.7,  $c_0$ = 100 mg/L,  $t$  = 1 h, room temperature.

## Reference

- 1 W. Zhao, X. Lin, H. Cai, T. Mu and X. Luo, *Ind. Eng. Chem. Res.*, 2017, **56**, 12745–12754.
- 2 A. A. Tolba, S. I. Mohamady, S. S. Hussin, T. Akashi, Y. Sakai, A. A. Galhoum and E. Guibal, *Carbohydr. Polym.*, 2017, **157**, 1809–1820.
- 3 X. Xu, J. Zou, J. Teng, Q. Liu, X. Y. Jiang, F. P. Jiao, J. G. Yu and X. Q. Chen, *Ecotoxicol. Environ. Saf.*, 2018, **166**, 1–10.
- 4 A. C. Texier, Y. Andrès and P. Le Cloirec, *Environ. Sci. Technol.*, 1999, **33**, 489–495.
- 5 A. A. Galhoum, M. G. Mafhouz, S. T. Abdel-Rehem, N. A. Gomaa, A. A. Atia, T. Vincent and E. Guibal, *Nanomaterials*, 2015, **5**, 154–179.
- 6 T. Kegl, A. Košak, A. Lobnik, Z. Novak, A. K. Kralj and I. Ban, *J. Hazard. Mater.*, 2020, **386**, 121632.
- 7 H. Ma, B. S. Hsiao and B. Chu, *ACS Macro Lett.*, 2012, **1**, 213–216.
- 8 S. Chen, J. Hong, H. Yang and J. Yang, *J. Environ. Radioact.*, 2013, **126**, 253–258.
- 9 M. Monier and D. A. Abdel-Latif, *Carbohydr. Polym.*, 2013, **97**, 743–752.

- 10 A. Gabor, C. M. Davidescu, A. Negrea, M. Ciopec, I. Grozav, P. Negrea and N. Duteanu, *J. Environ. Manage.*, 2017, **204**, 839–844.
- 11 E. Kusrini, W. Wicaksono, C. Gunawan, N. Z. A. Daud and A. Usman, *J. Environ. Chem. Eng.*, 2018, **6**, 6580–6588.
- 12 E. M. Iannicelli-Zubiani, P. Gallo Stampino, C. Cristiani and G. Dotelli, *Chem. Eng. J.*, 2018, **341**, 75–82.
- 13 Ş. Sert, C. Kütahyalı, S. Inan, Z. Talip, B. Çetinkaya and M. Eral, *Hydrometallurgy*, 2008, **90**, 13–18.
- 14 B. Arunraj, T. Sathvika, V. Rajesh and N. Rajesh, *ACS Omega*, 2019, **4**, 940–952.
- 15 S. Iftekhhar, V. Srivastava and M. Sillanpää, *Chem. Eng. J.*, 2017, **320**, 151–159.
- 16 A. Negrea, A. Gabor, C. M. Davidescu, M. Ciopec, P. Negrea, N. Duteanu and A. Barbulescu, *Sci. Rep.*, 2018, **8**, 1–11.
- 17 R. Bai, F. Yang, Y. Zhang, Z. Zhao, Q. Liao, P. Chen, P. Zhao, W. Guo and C. Cai, *Carbohydr. Polym.*, 2018, **190**, 255–261.
